# Supplementary material for: Unveiling the A-to-I mRNA editing machinery and its regulation and evolution in fungi
Source: PubMed Central journal article supplement (PMC11087585; doi:10.1038/s41467-024-48336-8), 2024-05-10
Supplement: 41467_2024_48336_MOESM1_ESM.pdf [file 41467_2024_48336_MOESM1_ESM.pdf]

# Supplementary Information

## Unveiling the A-to-I mRNA editing machinery and its regulation and evolution in fungi

Chanjing Feng<sup>1</sup>, Kaiyun Xin<sup>1</sup>, Yanfei Du<sup>1</sup>, Jingwen Zou<sup>1</sup>, Xiaoxing Xing<sup>1</sup>, Qi Xiu<sup>1</sup>, Yijie Zhang<sup>1</sup>, Rui Zhang<sup>2</sup>, Weiwei Huang<sup>2</sup>, Qinhu Wang<sup>1</sup>, Cong Jiang<sup>1</sup>, Xiaojie Wang<sup>1</sup>, Zhensheng Kang<sup>1</sup>, Jin-Rong Xu<sup>3</sup>, Huiquan Liu<sup>1\*</sup>

<sup>1</sup> State Key Laboratory for Crop Stress Resistance and High-Efficiency Production, College of Plant Protection, Northwest A&F University, Yangling, Shaanxi 712100, China

<sup>2</sup> College of Life Sciences, Northwest A&F University, Yangling, Shaanxi 712100, China

<sup>3</sup> Department of Botany and Plant Pathology, Purdue University, West Lafayette, IN 47907, USA

\* Corresponding author. Email: liuhuiquan@nwsuaf.edu.cn

### **This PDF file includes:**

Supplementary Fig. 1 to Fig. 10

Supplementary Table 1

Uncropped scans of all blots for Supplementary Fig. 9

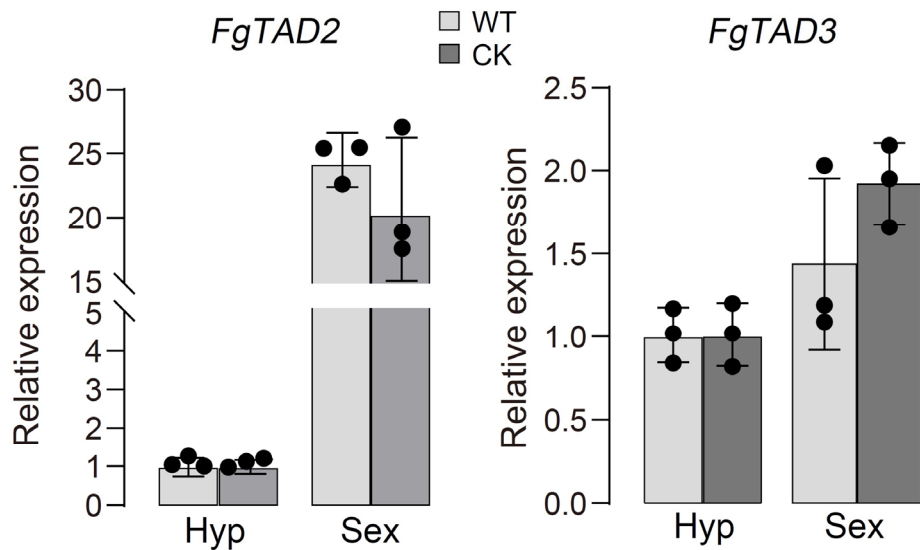

**Supplementary Fig. 1 | Fold changes in the expression of *FgTAD2* and *FgTAD3* in perithecia (Sex) compared to hyphae (Hyp) of the wild type (WT) and control check (CK) strain assessed using qRT-PCR.** The CK strain refers to the FG1G36140 deletion mutant utilized for the overexpression of *FgTAD3* and *FgTAD2* at the FG1G36140 locus. Data are presented as mean $\pm$ SD, n = 3 independent replicates. Source data are provided as a Source Data file.

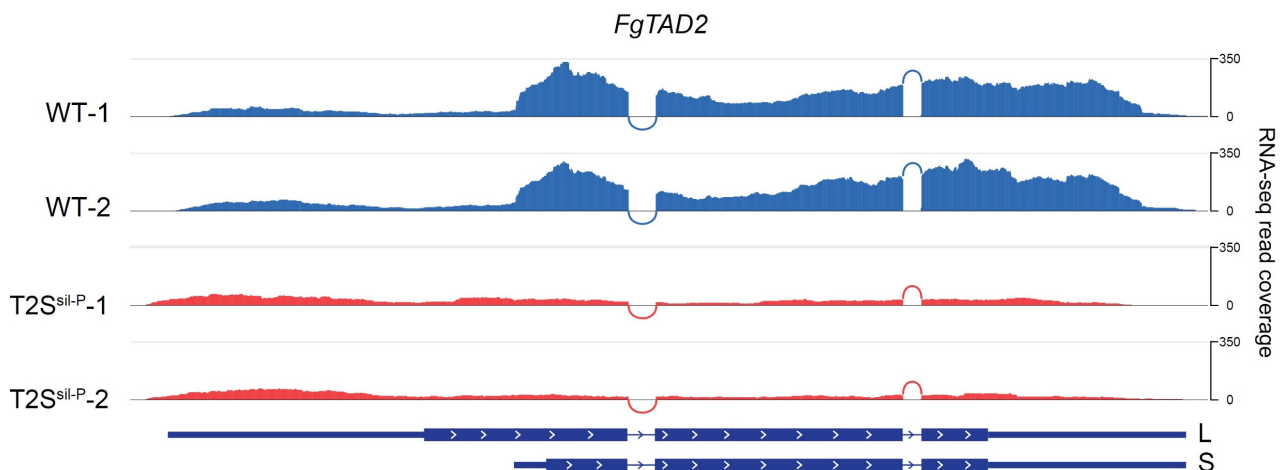

**Supplementary Fig. 2 | RNA-seq read coverage showing the expression of the long (L) and short (S) transcripts of *FgTAD2* in 7-dpf perithecia of the wild type (WT) and T2S<sup>sil-P</sup> mutant.** For each strain, data of two biological replicates are shown.

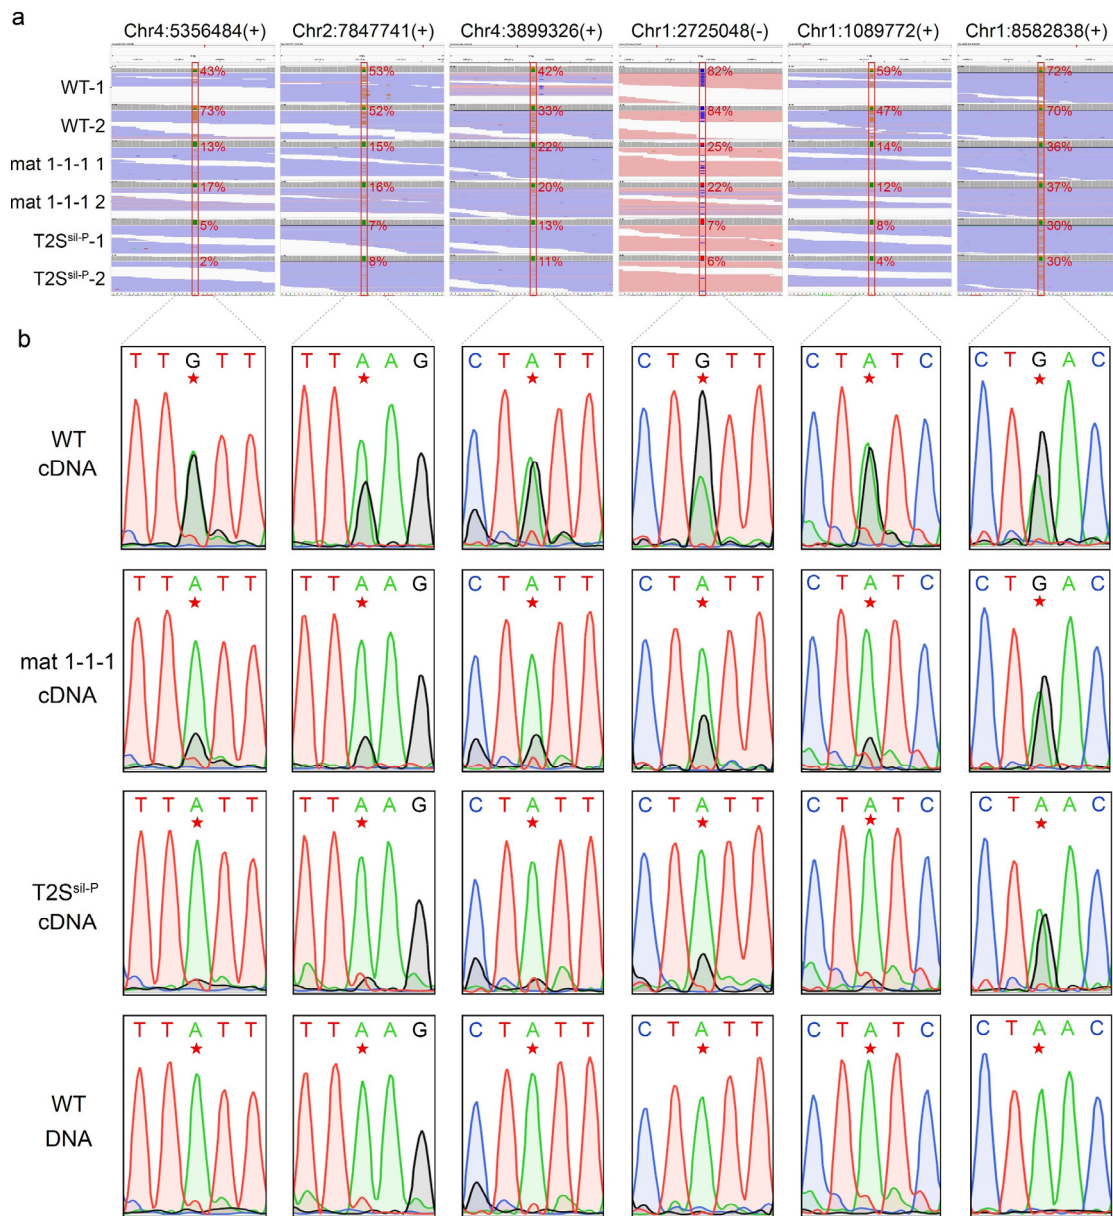

**Supplementary Fig. 3 | Validation of A-to-I mRNA editing sites identified by RNA-seq using Sanger sequencing. a** RNA-Seq read mapping showing six A-to-I mRNA editing sites detected in perithecia of the designated strains. Red boxes highlight the A-to-I mRNA editing sites, with their editing levels indicated. Data of two biological replicates (-1 and -2) are shown. **b** Validation of the A-to-I mRNA editing sites through Sanger sequencing of the RT-PCR (cDNA) and PCR (gDNA) products. The editing sites are marked by a red star. When editing occurs, two peaks (A and G) at the editing sites are observed in the sequencing traces.

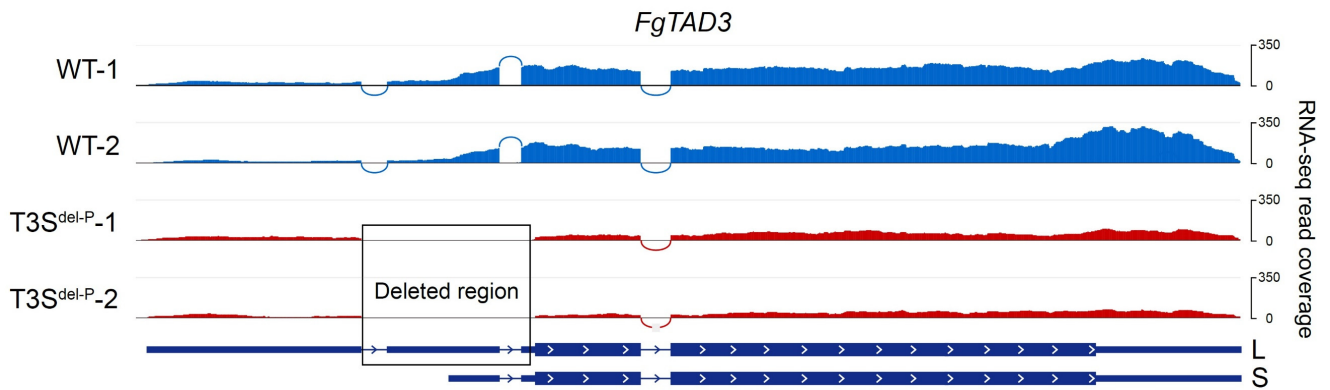

**Supplementary Fig. 4 | RNA-seq read coverage showing the expression of the long (L) and short (S) transcripts of *FgTAD3* in 7-dpf perithecia of the wild type (WT) and *T3S<sup>del-P</sup>* mutant. For each strain, data of two biological replicates are shown. The deleted promoter region of the S-transcript in the *T3S<sup>del-P</sup>* mutant is indicated.**

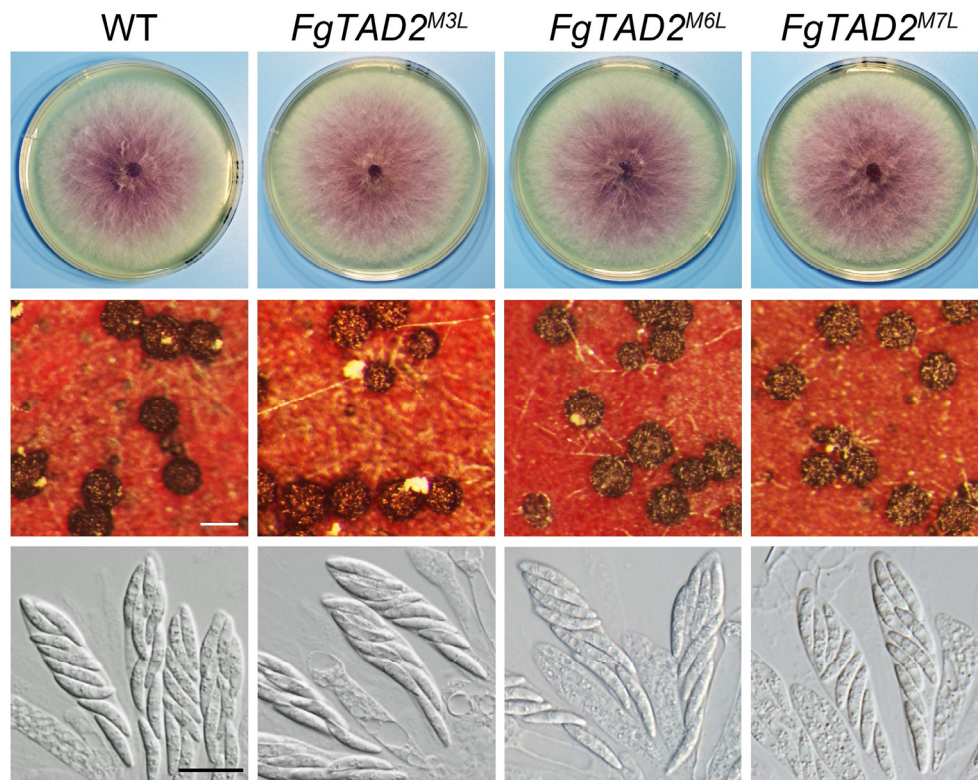

**Supplementary Fig. 5 | Normal vegetative growth and sexual development in *FgTAD2<sup>M3L</sup>*, *FgTAD2<sup>M6L</sup>*, and *FgTAD2<sup>M7L</sup>* mutants. White bar = 0.2 mm; black bar = 20  $\mu$ m. All images shown are representative of consistent results from at least three independent experiments.**

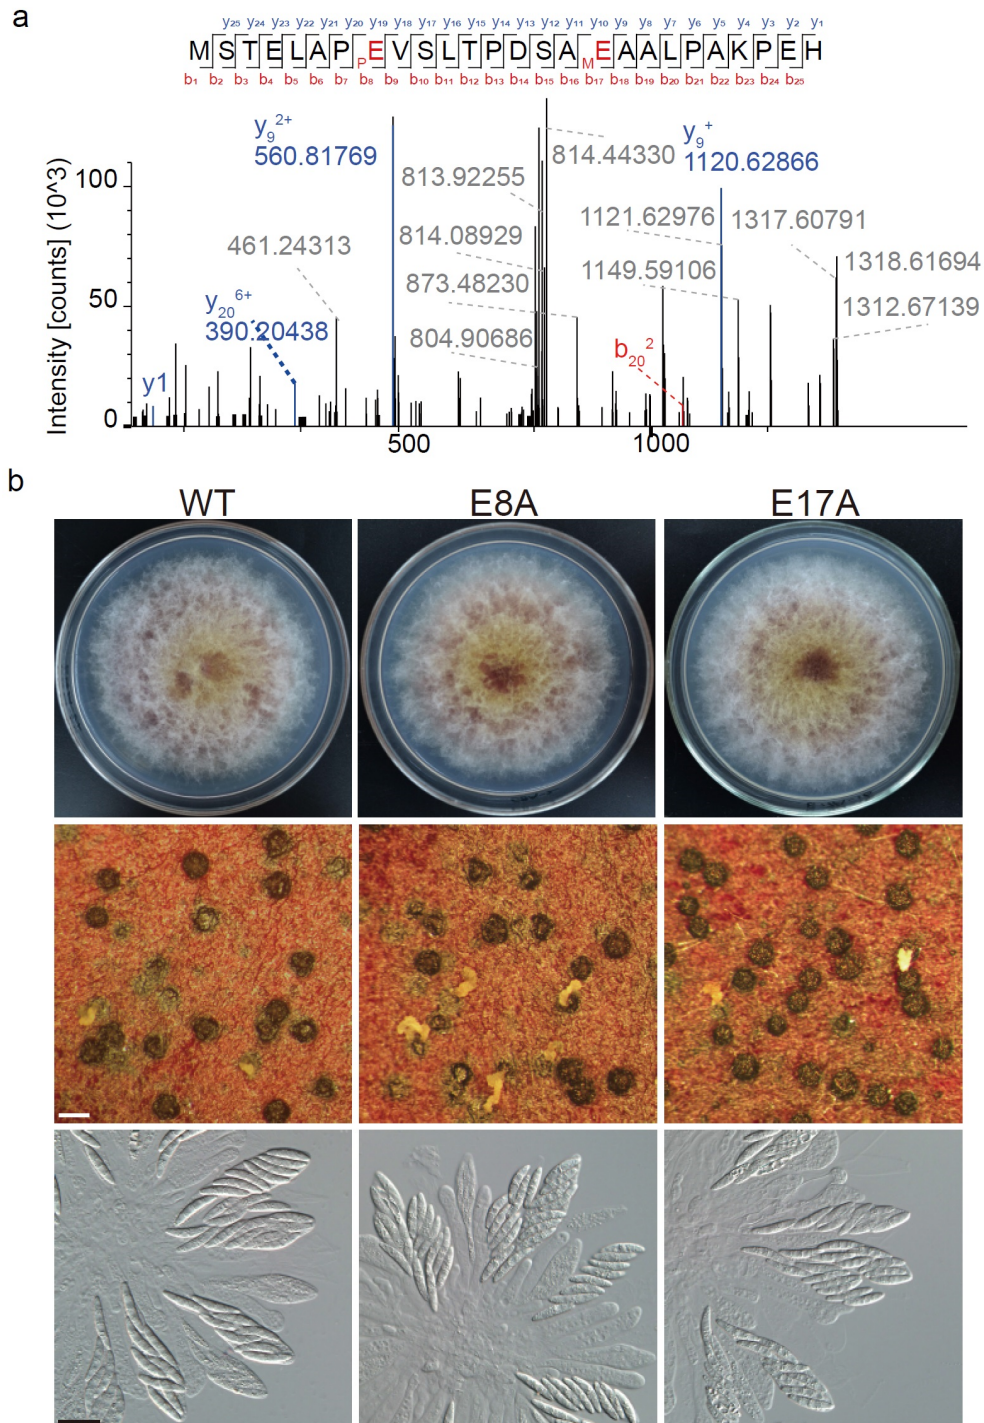

**Supplementary Fig. 6 | Normal vegetative growth and sexual development in the post-translational modification-deficient mutants *FgTAD3<sup>E8A</sup>* and *FgTAD3<sup>E17A</sup>*.** **a** MS/MS spectrum of the peptide containing the phosphorylated (pE<sup>8</sup>) and methylated (mE<sup>17</sup>) residues. **b** Colony morphology, perithecium formation, and asci/ascospores morphology of the modification-deficient mutants *FgTAD3<sup>E8A</sup>* and *FgTAD3<sup>E17A</sup>*. White bar = 0.2 mm; black bar = 20  $\mu$ m. All images shown are representative of consistent results from at least three independent experiments.

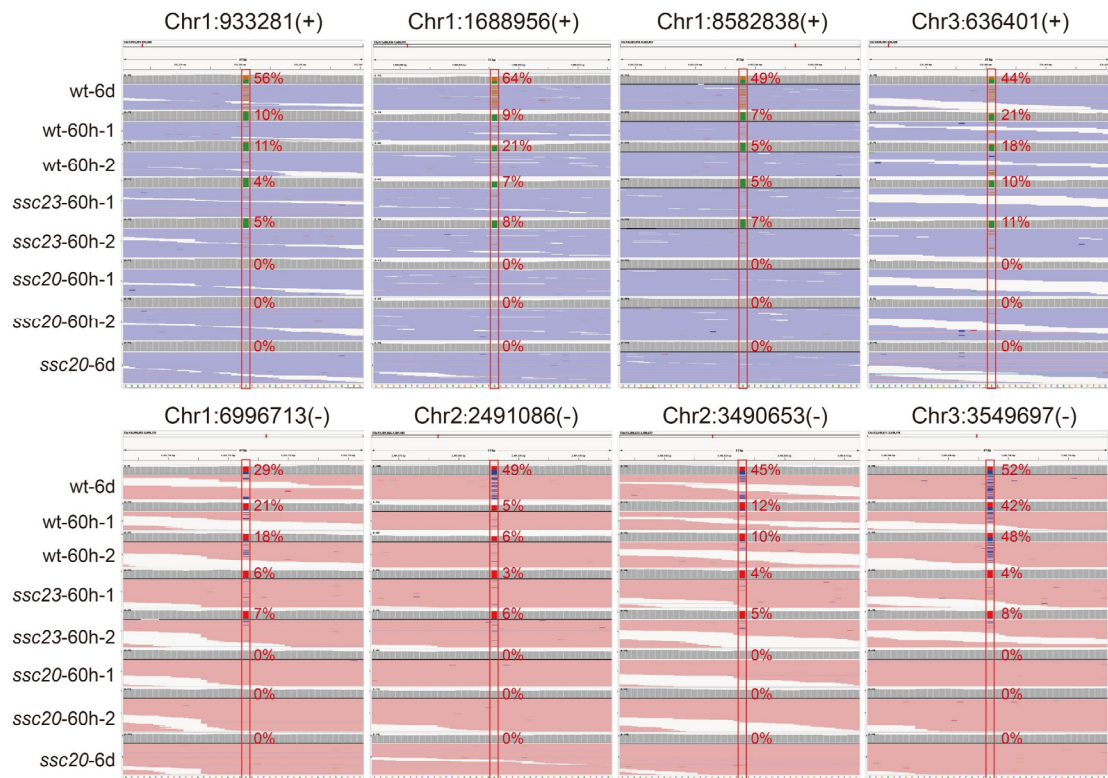

**Supplementary Fig. 7 | IGV read mapping showing four A-to-I mRNA editing sites detected in RNA-Seq data of the wild type (wt) and *ssc23* deletion mutant but not the *ssc20/ame1* deletion mutant. Red boxes highlight the A-to-I mRNA editing sites, with their editing levels indicated. Data of two biological replicates (-1 and -2) are shown.**

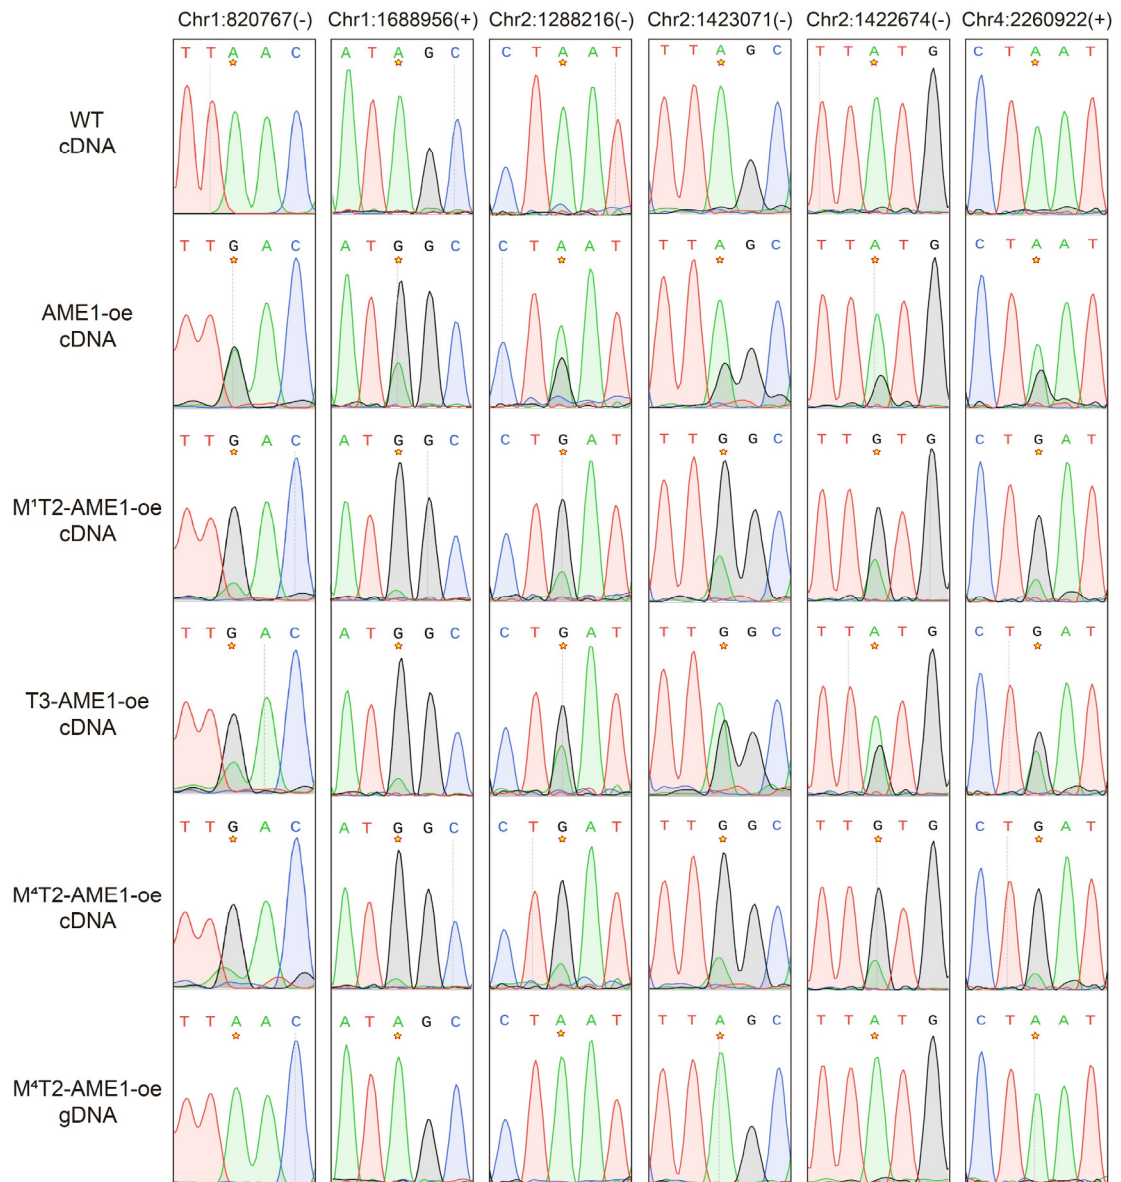

**Supplementary Fig. 8 | Validation of A-to-I mRNA editing sites identified in 24-h hyphae of the designated strains by RNA-seq using Sanger sequencing of the RT-PCR (cDNA) and PCR (gDNA) products. The editing sites are marked by a red star. When editing occurs, two peaks (A and G) at the editing sites are observed in the sequencing traces.**

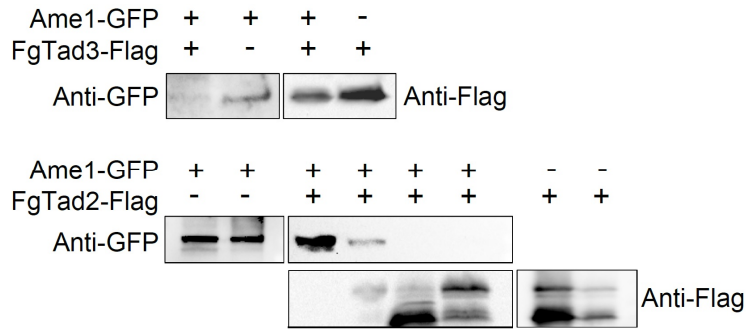

**Supplementary Fig. 9 | Western blots showing the expression of Ame1-GFP suppressed when co-expressed with FgTad2-FLAG or FgTad3-FLAG.** All images shown are representative of consistent results from at least three independent experiments.

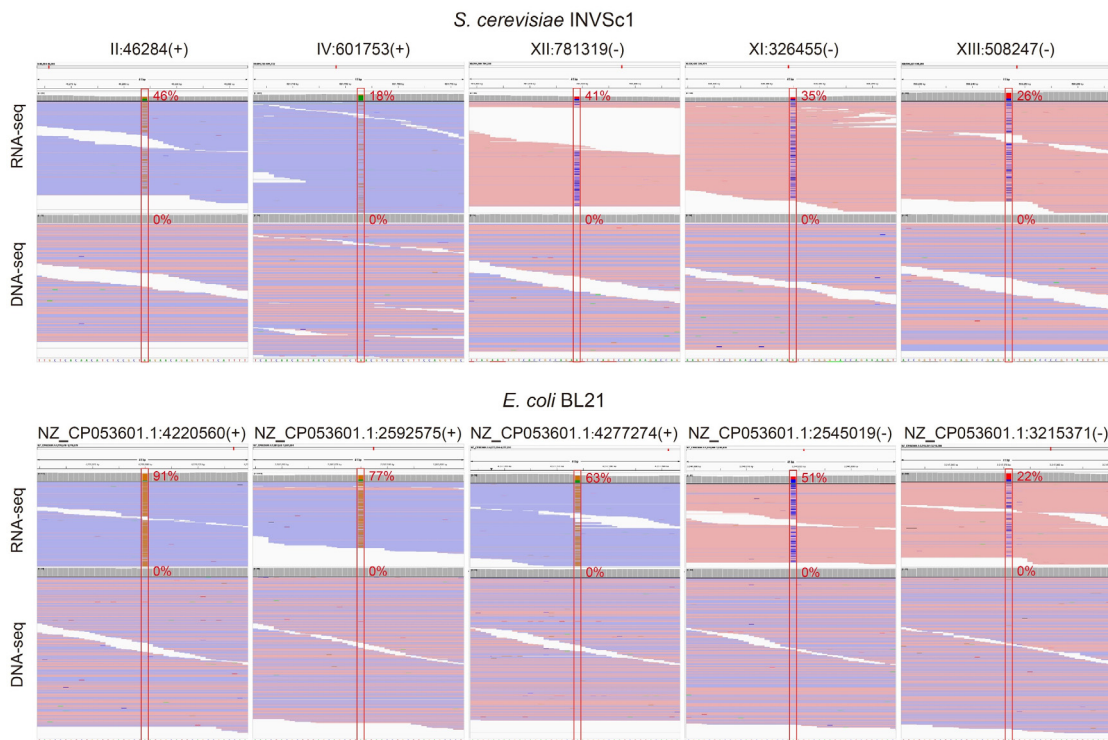

**Supplementary Fig. 10 | IGV read mapping showing A-to-I mRNA editing events detected in RNA-Seq data but not DNA-seq data of the yeast INVSc1 strain and *E. coli* BL21 strain expressing the FgTad2-FgTad3-Ame1 complex.** Red boxes highlight the A-to-I mRNA editing sites, with their editing levels indicated.



**Supplementary Table 1 | Number of A-to-I RNA editing sites detected in each strain.**

| Type | WT-60h-1     | WT-60h-2     | ssc23-60h-1 | ssc23-60h-2 | ssc20-60h-1 | ssc20-60h-2 | ssc20-6d | <i>FgTAD3<sup>M120I</sup></i> -7d | WT-Hy24h-1 | WT-Hy24h-2 |
|------|--------------|--------------|-------------|-------------|-------------|-------------|----------|-----------------------------------|------------|------------|
| AC   | 22           | 23           | 25          | 29          | 34          | 42          | 15       | 96                                | 6          | 10         |
| AG*  | 151<br>(141) | 171<br>(162) | 34 (23)     | 40 (28)     | 14 (0)      | 15 (0)      | 16 (0)   | 52 (40)                           | 12 (0)     | 15 (1)     |
| AT   | 17           | 14           | 23          | 15          | 18          | 20          | 17       | 33                                | 20         | 20         |
| CA   | 13           | 16           | 18          | 12          | 11          | 20          | 10       | 53                                | 17         | 8          |
| CG   | 9            | 9            | 9           | 9           | 8           | 10          | 7        | 14                                | 9          | 9          |
| CT   | 15           | 15           | 14          | 21          | 21          | 21          | 23       | 60                                | 42         | 31         |
| GA   | 80           | 79           | 87          | 64          | 77          | 99          | 82       | 53                                | 29         | 26         |
| GC   | 8            | 12           | 14          | 9           | 9           | 14          | 12       | 13                                | 12         | 9          |
| GT   | 29           | 29           | 35          | 24          | 37          | 26          | 38       | 86                                | 52         | 54         |
| TA   | 15           | 15           | 15          | 13          | 13          | 18          | 18       | 21                                | 21         | 24         |
| TC   | 38           | 45           | 47          | 53          | 44          | 63          | 49       | 47                                | 35         | 27         |
| TG   | 26           | 19           | 23          | 32          | 19          | 21          | 12       | 44                                | 14         | 10         |

\*The number in parentheses represents the count of A-to-I RNA editing sites that have been manually confirmed using IGV and RNA-seq BAM files. Data of two biological replicates (-1 and -2) are shown.

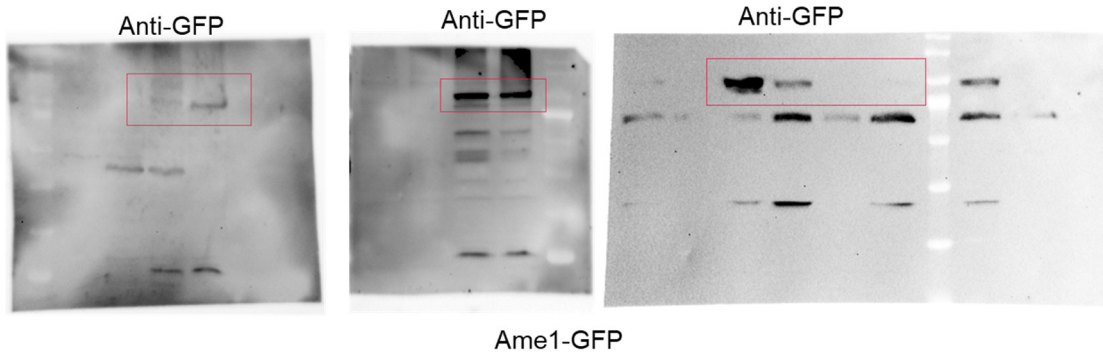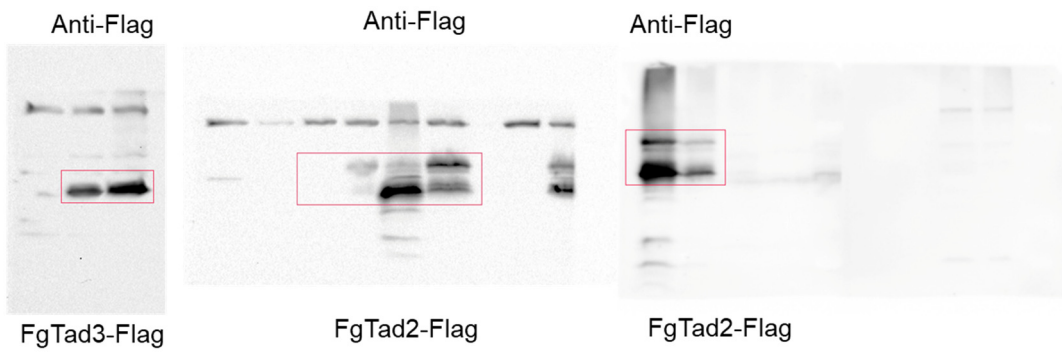

**Uncropped scans of all blots for Supplementary Fig. 9**
